# Supplementary material for: An optimized derivative of an endogenous CXCR4 antagonist prevents atopic dermatitis and airway inflammation
Source: PubMed Central journal article supplement — Acta Pharm Sin B. 2020 Dec 13;11(9):2694–708. doi: 10.1016/j.apsb.2020.12.005 (PMC8463264; doi:10.1016/j.apsb.2020.12.005), 2020-12-13

## Supplemental Information for

### Original article

# An optimized derivative of an endogenous CXCR4 antagonist prevents atopic dermatitis and airway inflammation

Mirja Harms<sup>a</sup>, Monica M.W. Habib<sup>b</sup>, Simona Nemska<sup>c</sup>, Antonella Nicolò<sup>d</sup>, Andrea Gilg<sup>a</sup>, Nico Preising<sup>e</sup>, Pandian Sokkar<sup>f,g,h</sup>, Sara Carmignani<sup>i</sup>, Martina Raasholm<sup>j</sup>, Gilbert Weidinger<sup>j</sup>, Gönül Kizilsavas<sup>k</sup>, Manfred Wagner<sup>k</sup>, Ludger Ständker<sup>e</sup>, Ashraf H. Abadi<sup>b</sup>, Hassan Jumaa<sup>d</sup>, Frank Kirchhoff<sup>a</sup>, Nelly Frossard<sup>c</sup>, Elsa Sanchez-Garcia<sup>f,g</sup>, Jan Münch<sup>a,e,\*</sup>

<sup>a</sup>*Institute of Molecular Virology, Ulm University Medical Center, Ulm 89081, Germany*

<sup>b</sup>*Department of Pharmaceutical Chemistry, Faculty of Pharmacy and Biotechnology, German University in Cairo, Cairo 11835, Egypt*

<sup>c</sup>*Laboratoire d'Innovation Thérapeutique, UMR7200 CNRS/Université de Strasbourg and LabEx MEDALIS, Faculté de Pharmacie, Illkirch 67412, France*

<sup>d</sup>*Institute of Immunology, Ulm University Medical Center, Ulm 89081, Germany*

<sup>e</sup>*Core Facility Functional Peptidomics, Ulm University Medical Center, Ulm 89081, Germany*

<sup>f</sup>*Center of Medical Biotechnology, University of Duisburg-Essen, Duisburg 47057, Germany*

<sup>g</sup>*Max-Planck-Institute for Coal Research, Düsseldorf 45470, Germany*

<sup>h</sup>*Faculty of Allied Health Sciences, Chettinad Hospital and Research Institute, Chettinad Academy of Research and Education, Kelambakkam 603103, India*

<sup>i</sup>*Max-Planck-Institut für Molekulare Physiologie, Dortmund 44227, Germany*

<sup>j</sup>*Institute of Biochemistry and Molecular Biology, Ulm University, Ulm 89081, Germany*

<sup>k</sup>*Max Planck Institute for Polymer Research, Mainz 55128, Germany*

\*Corresponding author. Tel.: +49 731 50065150; fax: +49 731 50065154.

E-mail address: [jan.muench@uni-ulm.de](mailto:jan.muench@uni-ulm.de) (Jan Münch).

Received 21 September 2020; received in revised form 10 November 2020; accepted 1 December

2020

**Table S1** Summary of peptide purities.

| Name<br>(EPI-X4) | Sequence     | Expected<br>MW | Detected<br>MW | Yield<br>(%) | Purity<br>(%) | Retention<br>time (min) |
|------------------|--------------|----------------|----------------|--------------|---------------|-------------------------|
| WSC 02           | IVRWSKKVPCVS | 1401.73        |                |              |               |                         |
| JM #1            | ILRWSKKVPCVS | 1415.77        | 1416.44        | 33.63        | 90.61         | 14.90                   |
| JM #2            | IFRWSKKVPCVS | 1449.78        | 1450.00        | 10.55        | 79.95         | 15.43                   |
| JM #3            | IVRWSRKVPCVS | 1429.75        | 1430.44        | 11.55        | 93.99         | 14.78                   |
| JM #4            | IVRWSHKVPCVS | 1410.71        | 1411.36        | 10.79        | 86.19         | 14.73                   |
| JM #5            | IVRWSKKLPCVS | 1415.77        | 1416.51        | 22.48        | 97.23         | 15.23                   |
| JM #6            | IVRWSKKIPCVS | 1415.77        | 1416.51        | 8.58         | 90.76         | 15.08                   |
| JM #7            | IVRWSKKFPCVS | 1449.78        | 1450.50        | 30.09        | 100.00        | 15.51                   |
| JM #8            | ILRWSRKVPCVS | 1443.78        | 1444.36        | 22.68        | 100.00        | 15.33                   |
| JM #9            | ILRWSHKVPCVS | 1424.73        | 1425.16        | 38.10        | 100.00        | 15.32                   |
| JM #10           | IFRWSRKVPCVS | 1477.80        | 1478.68        | 13.05        | 84.14         | 15.66                   |
| JM #11           | IFRWSHKVPCVS | 1458.75        | 1459.41        | 15.55        | 89.92         | 16.18                   |
| JM #13           | ILRWSRKMPCVS | 1475.84        | 1476.04        | 20.93        | 100.00        | 15.43                   |
| JM #18           | ILRWSRKMPCLS | 1489.80        | 1490.16        | 22.92        | 99.22         | 16.01                   |
| JM #19           | ILRWSRKMPCFS | 1523.89        | 1524.02        | 25.68        | 86.18         | 16.42                   |
| JM #20           | ILRWSRKMPCMS | 1507.91        | 1507.88        | 18.41        | 84.59         | 15.72                   |
| JM #21           | ILRWSRKLPCVS | 1457.81        | 1458.09        | 24.52        | 93.14         | 15.89                   |
| JM #23           | ILRWSRKVPSVS | 1427.71        | 1428.84        | 19.38        | 98.49         | 14.79                   |

# EPI-X4 JM#1

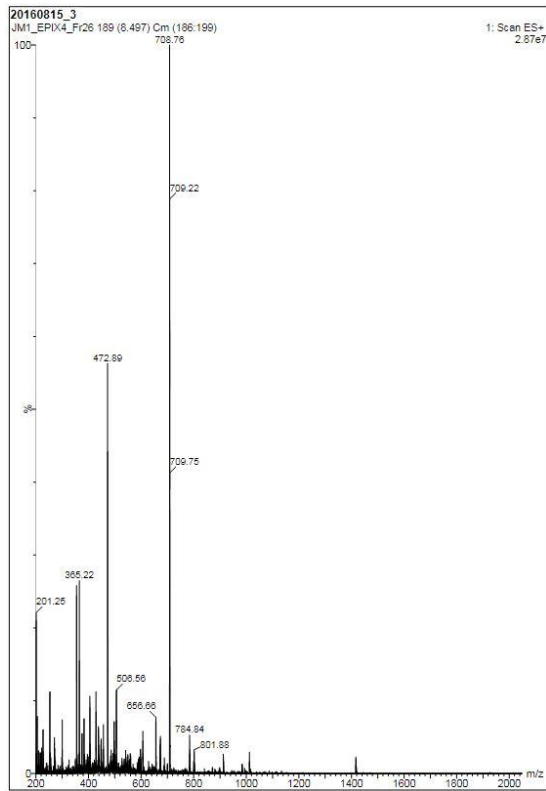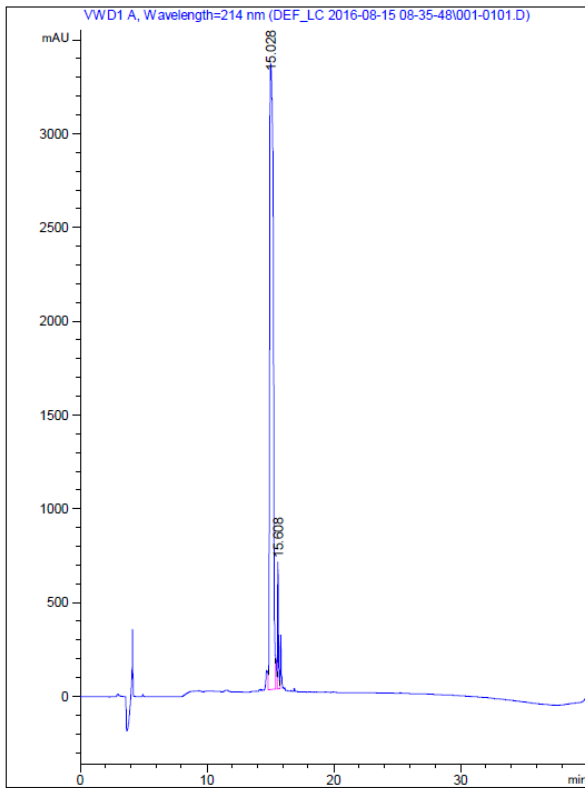

# EPI-X4 JM#2

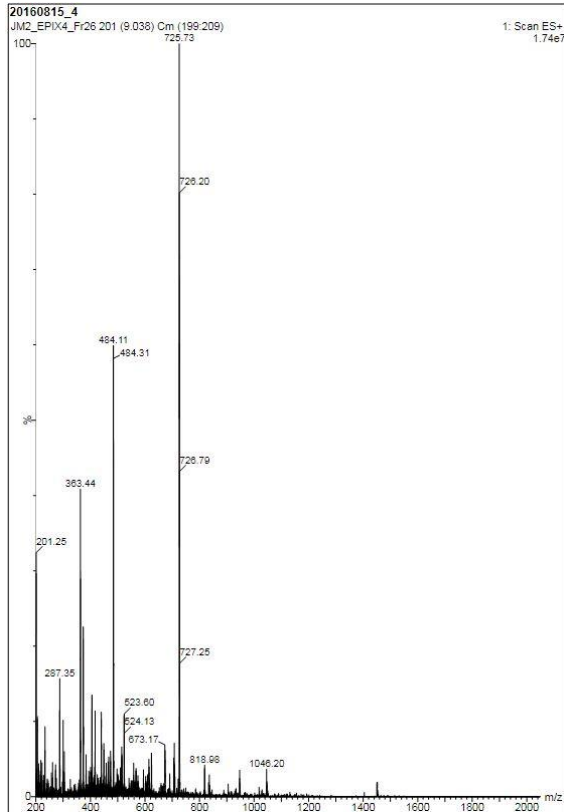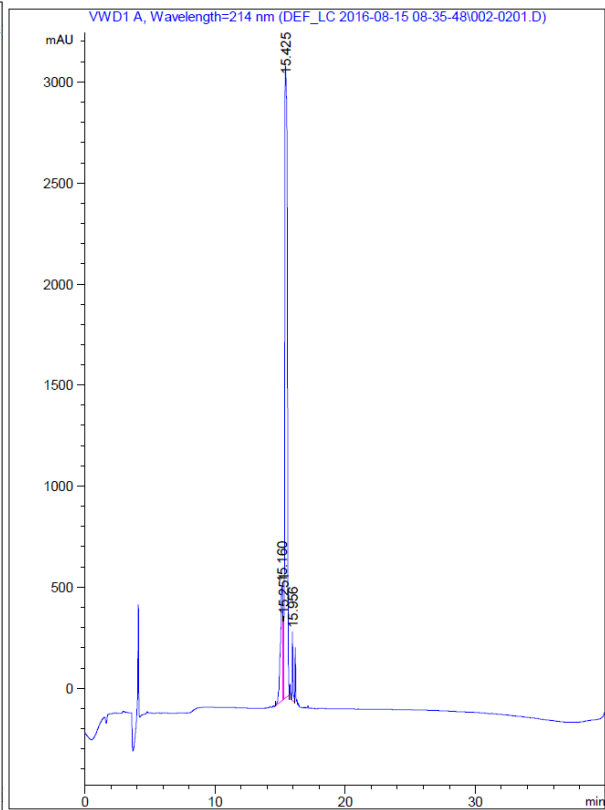

### EPI-X4 JM#3

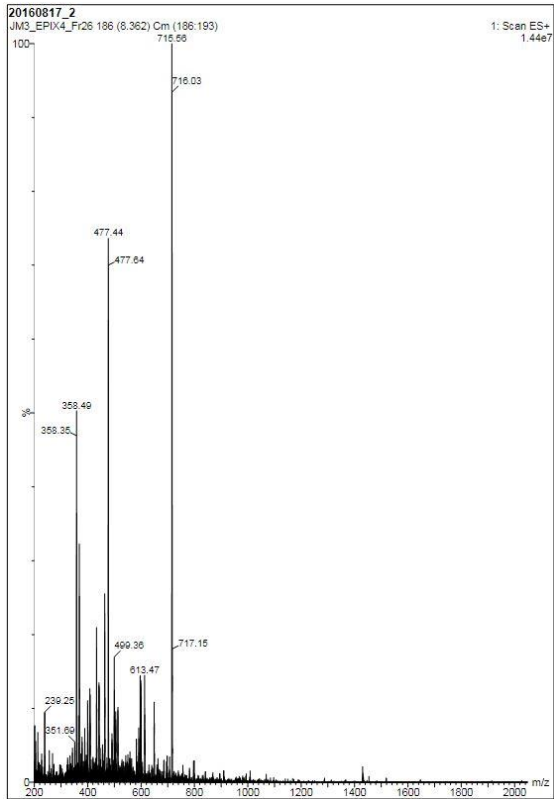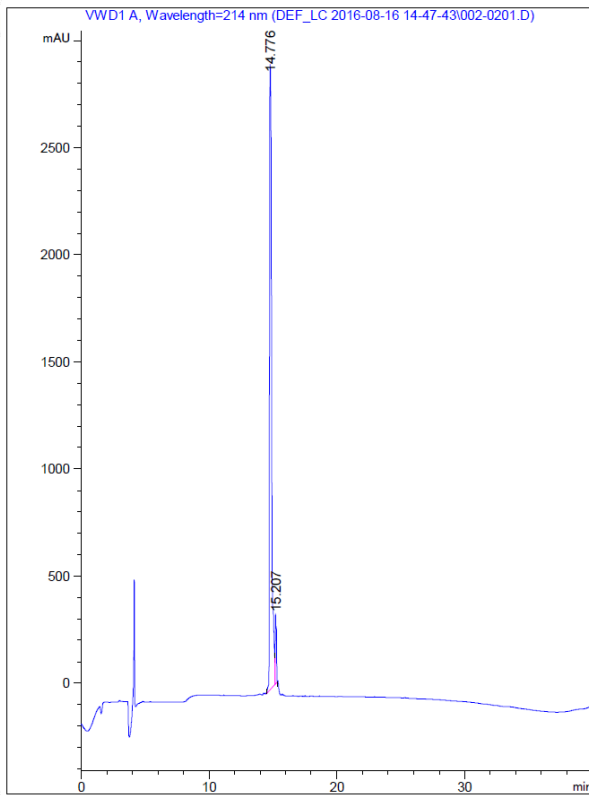

### EPI-X4 JM#4

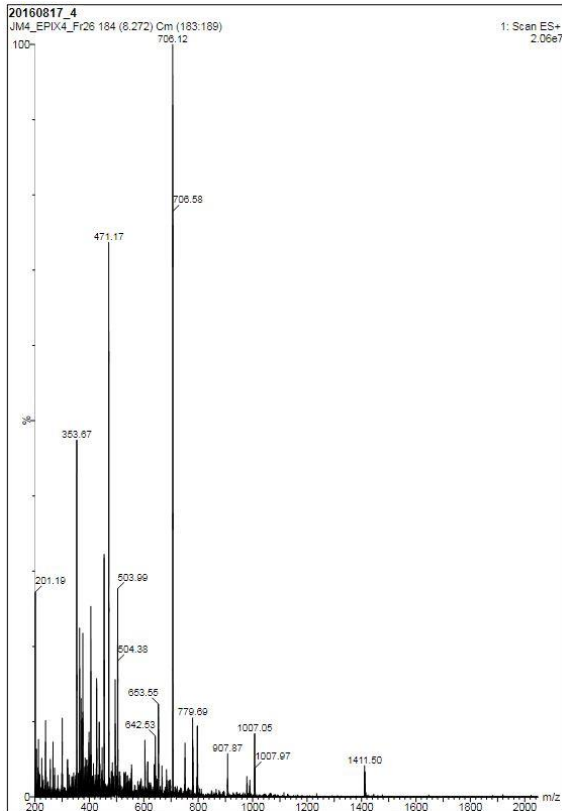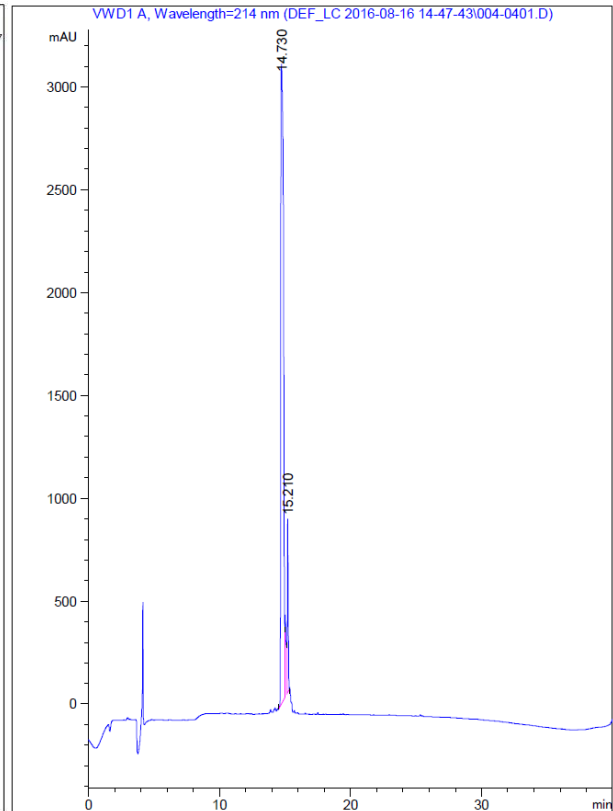

### EPI-X4 JM#5

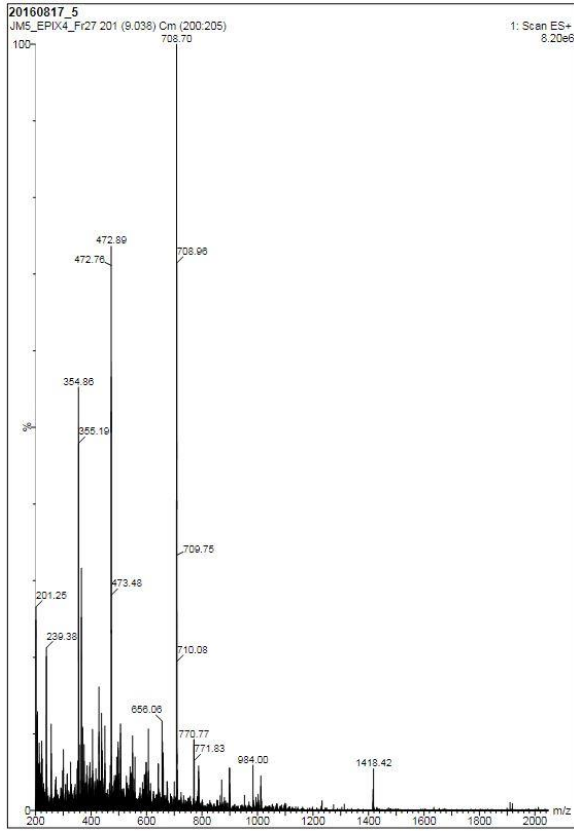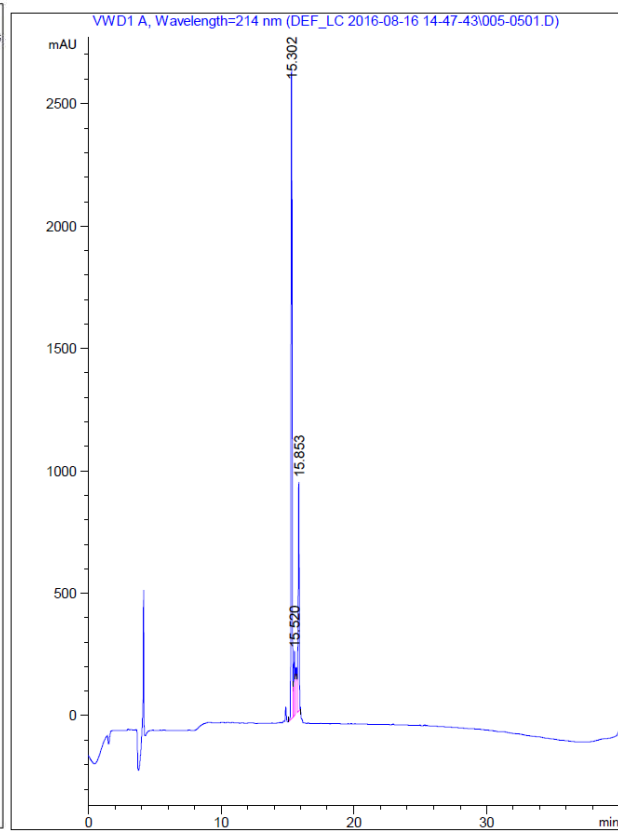

### EPI-X4 JM#6

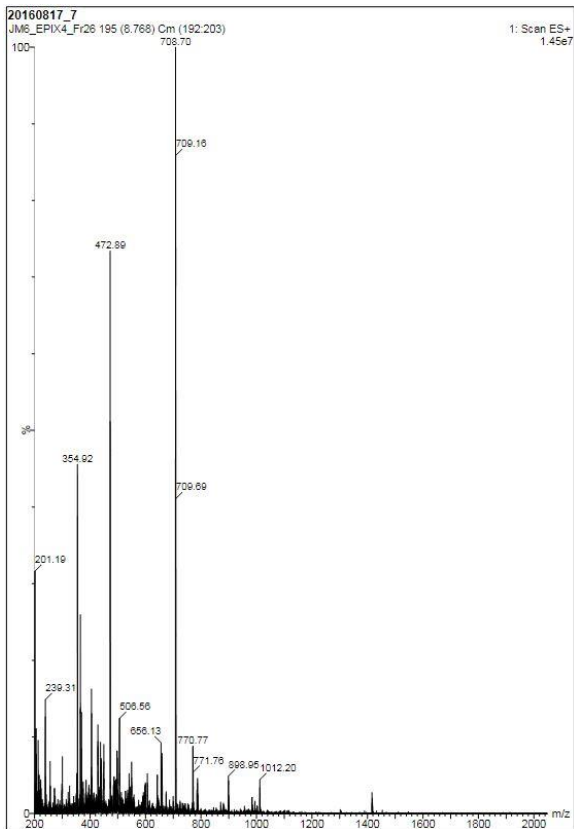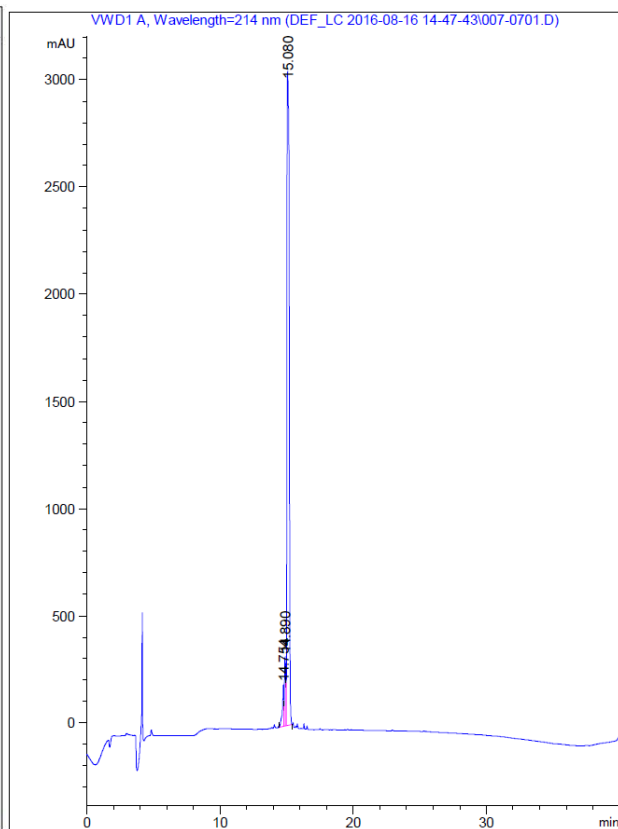

### EPI-X4 JM#7

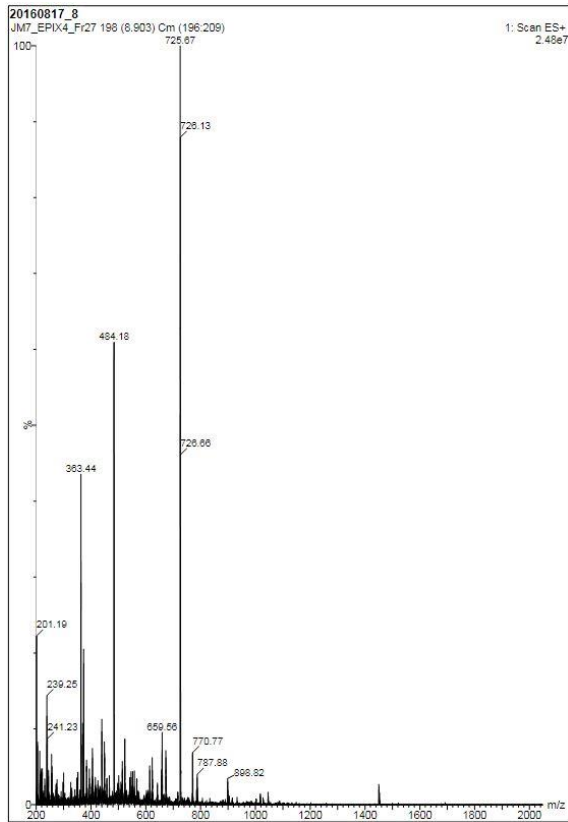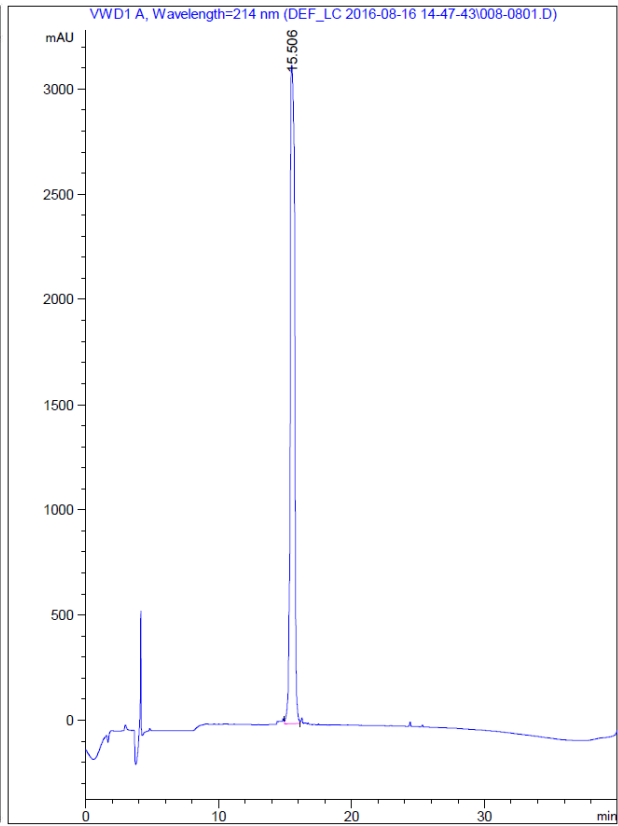

### EPI-X4 JM#8

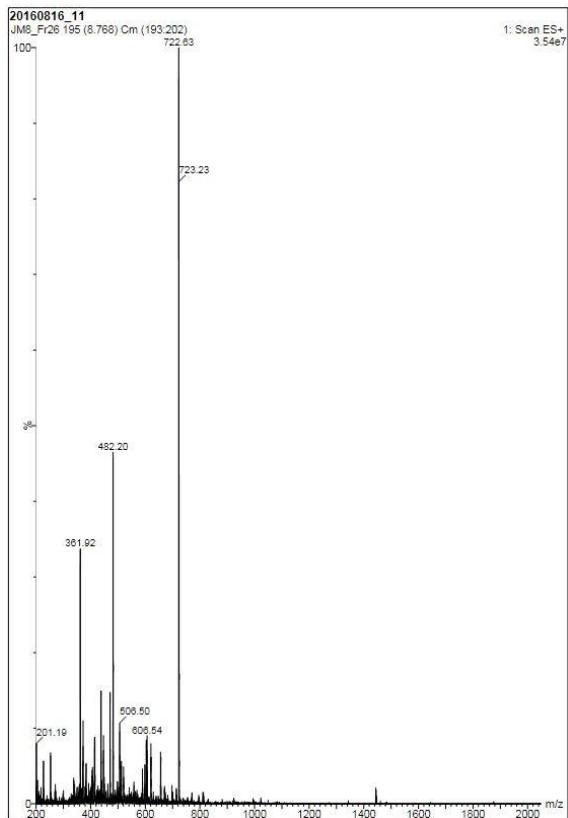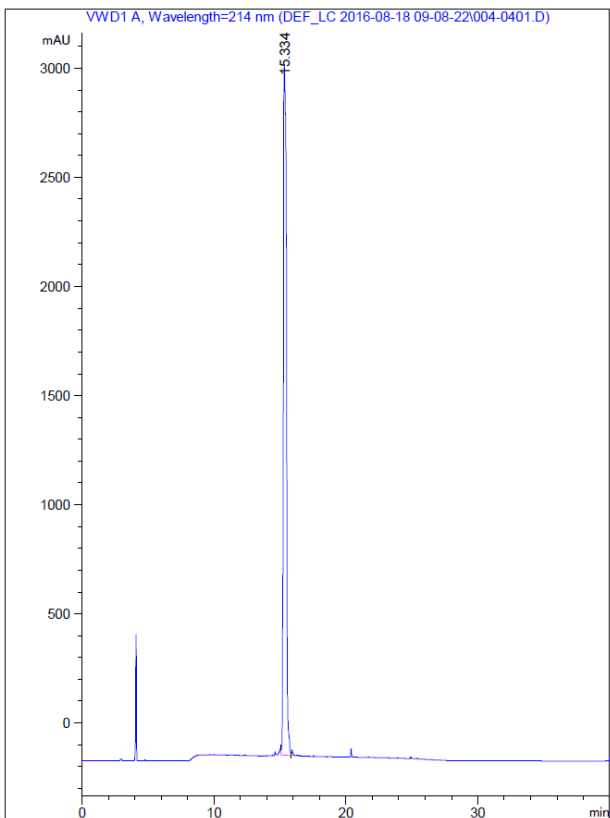

# EPI-X4 JM#9

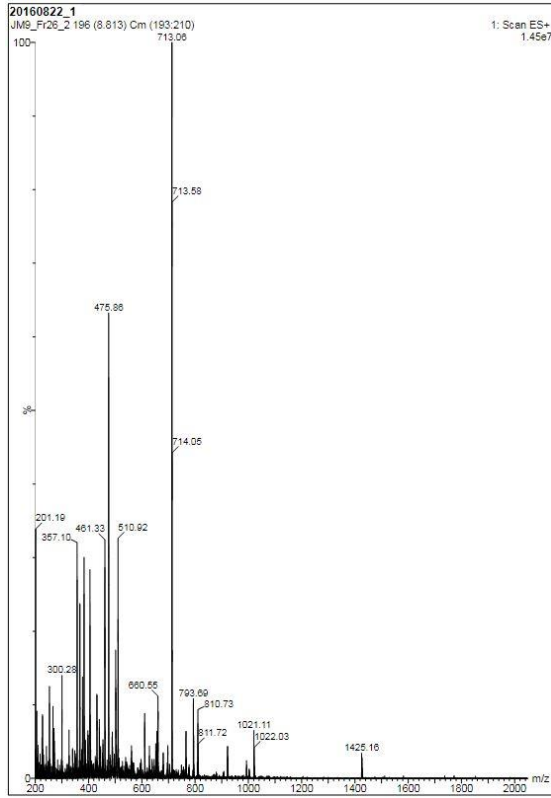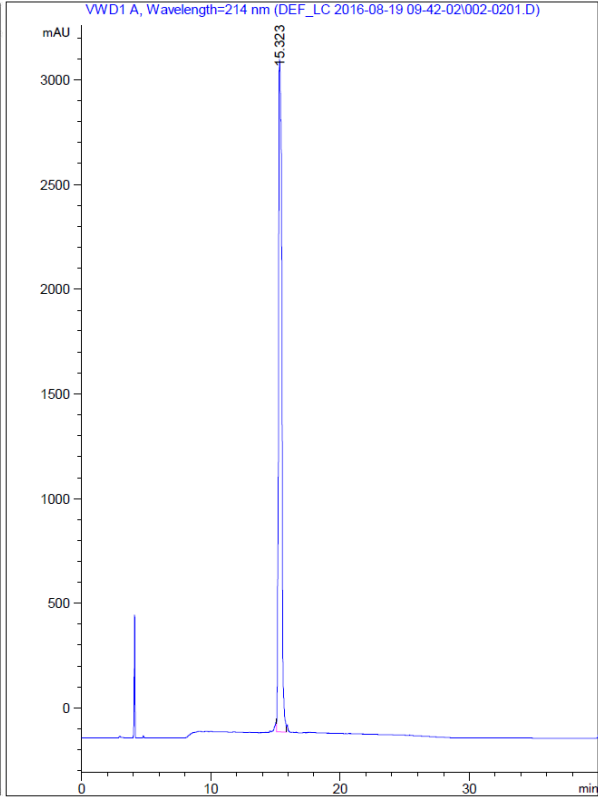

# EPI-X4 JM#10

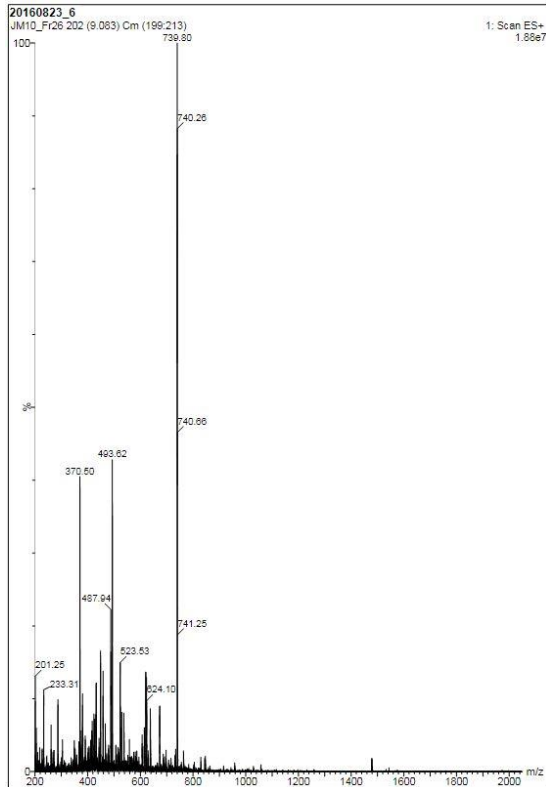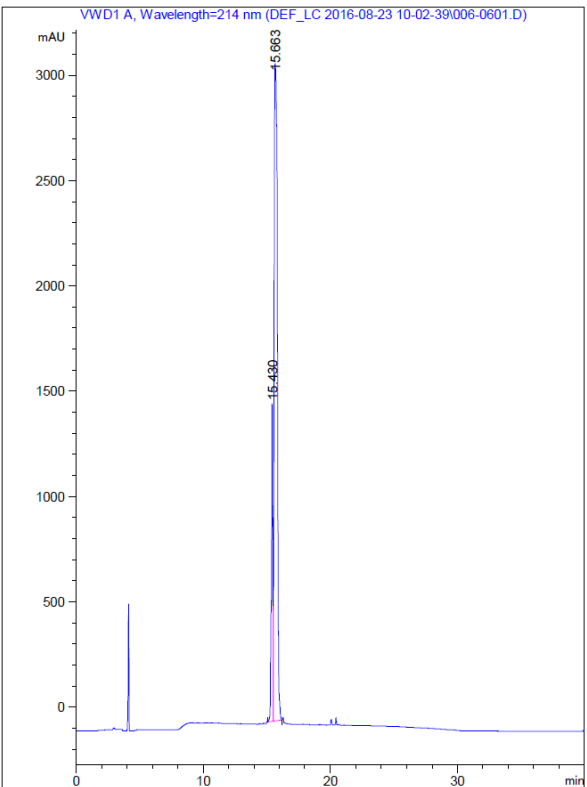

# EPI-X4 JM#11

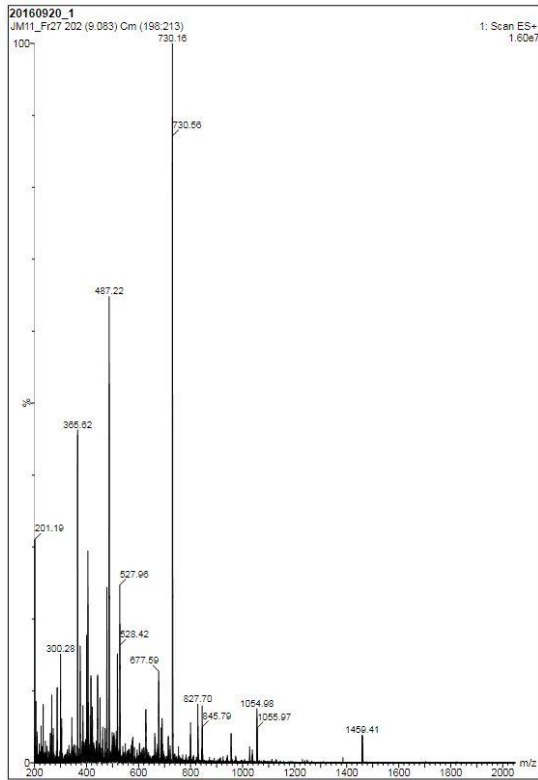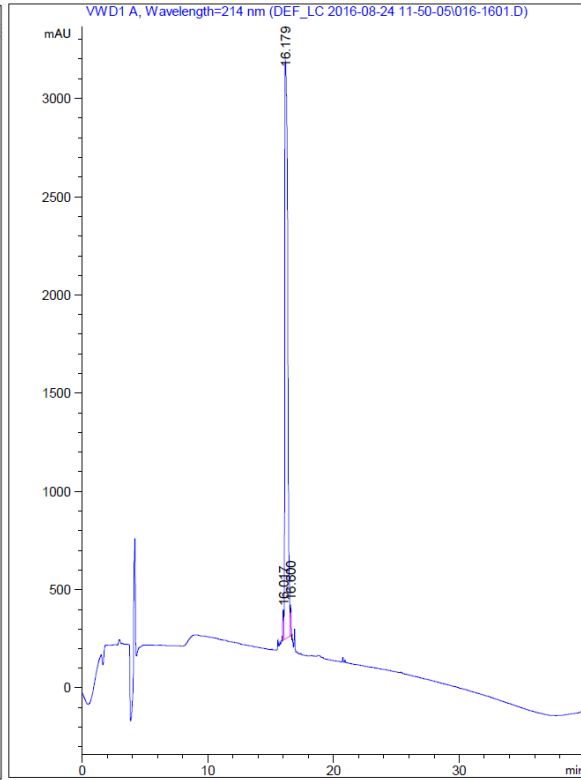

# EPI-X4 JM#13

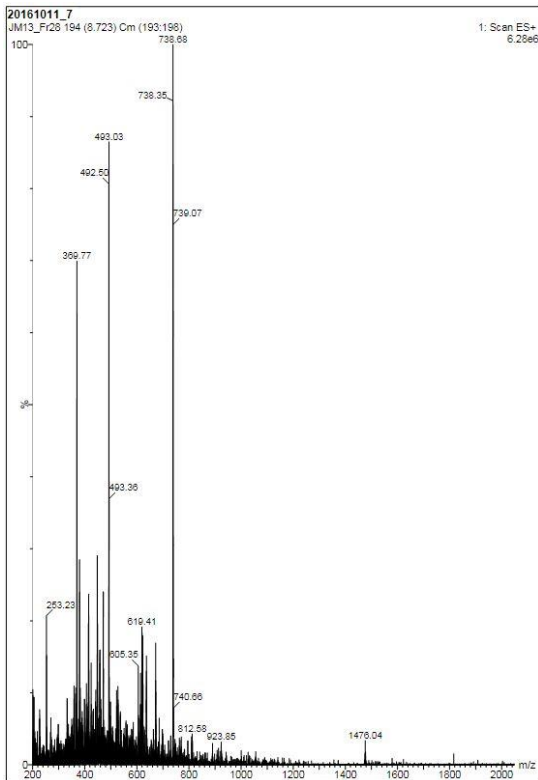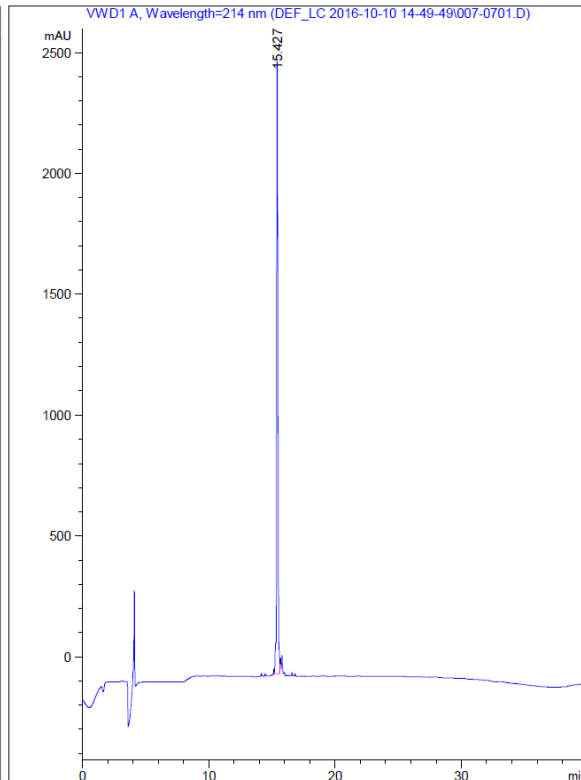



# EPI-X4 JM#18

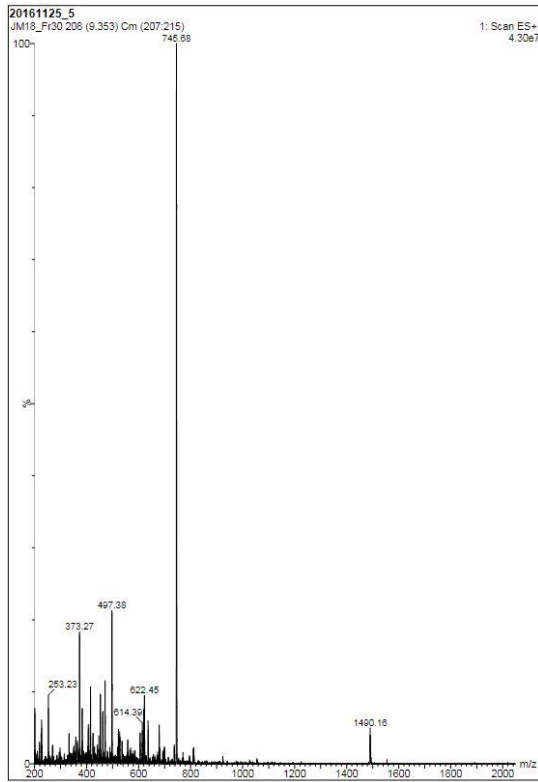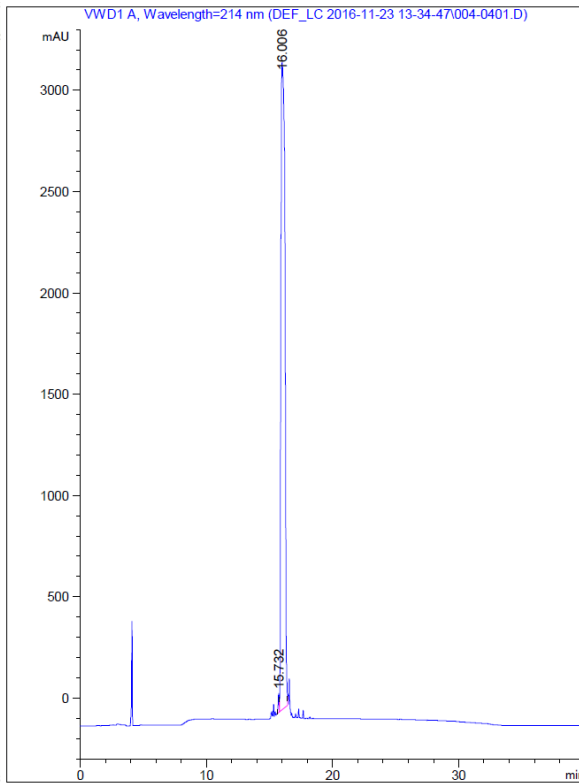

# EPI-X4 JM#19

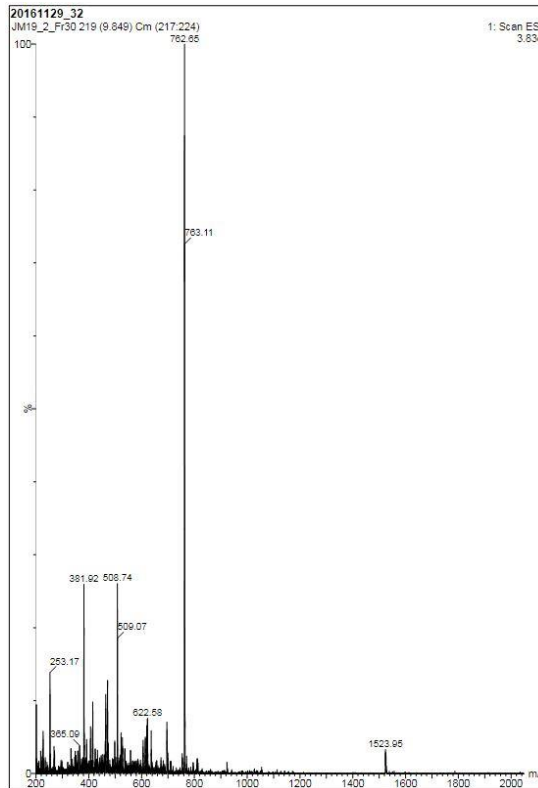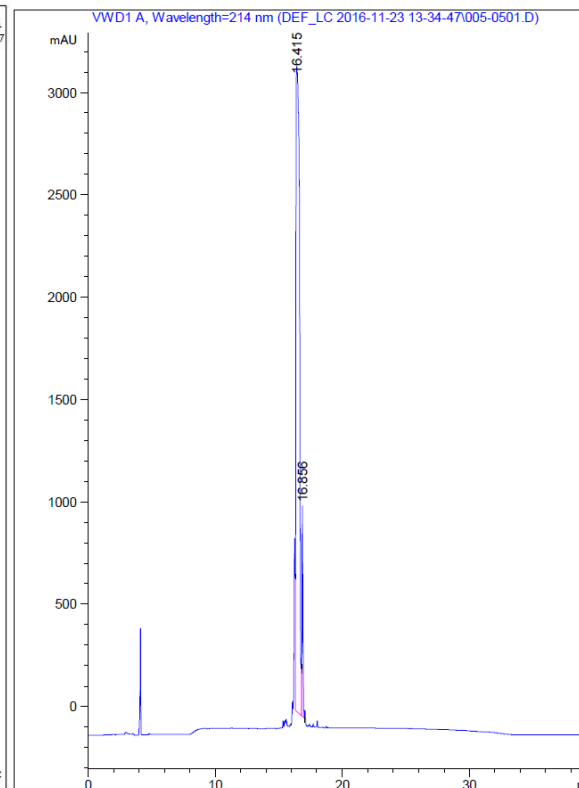

# EPI-X4 JM#20

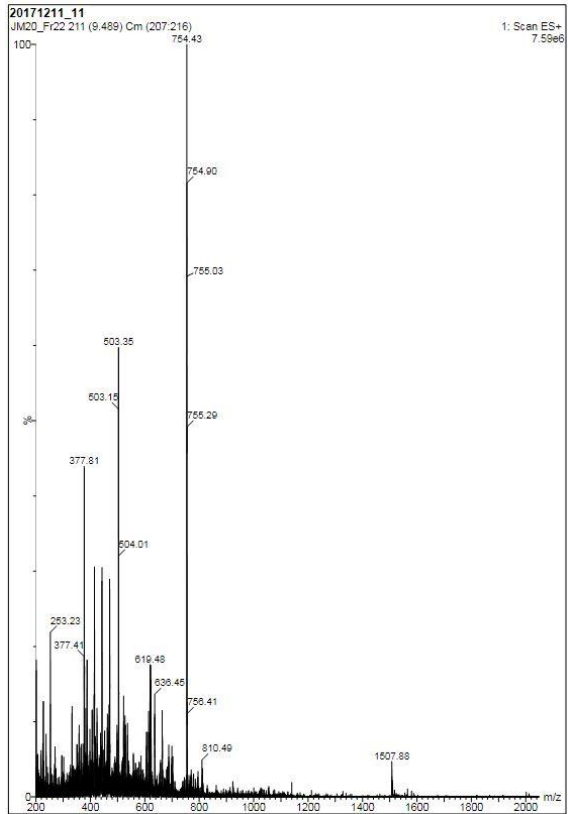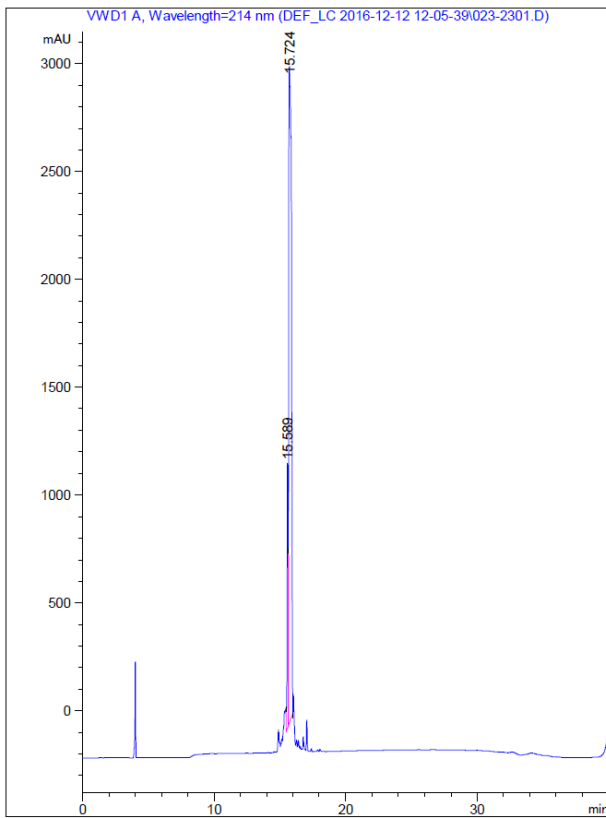

# EPI-X4 JM#21

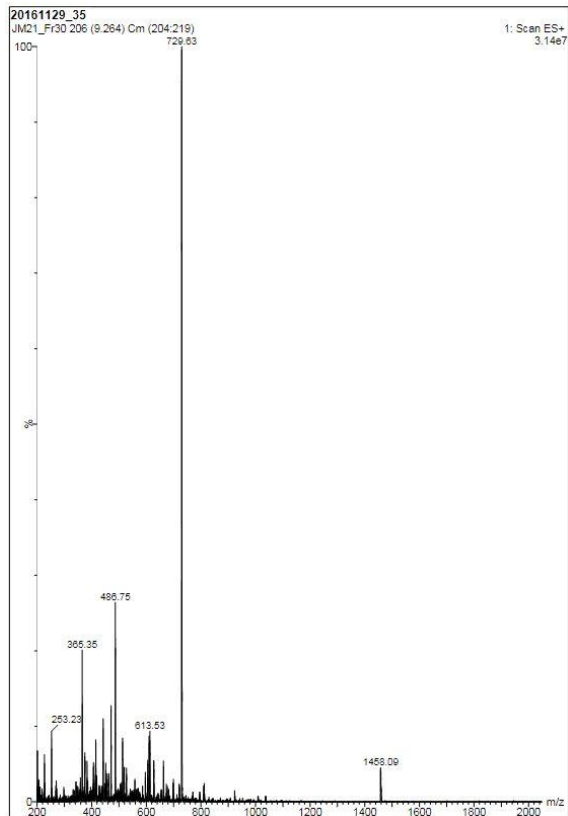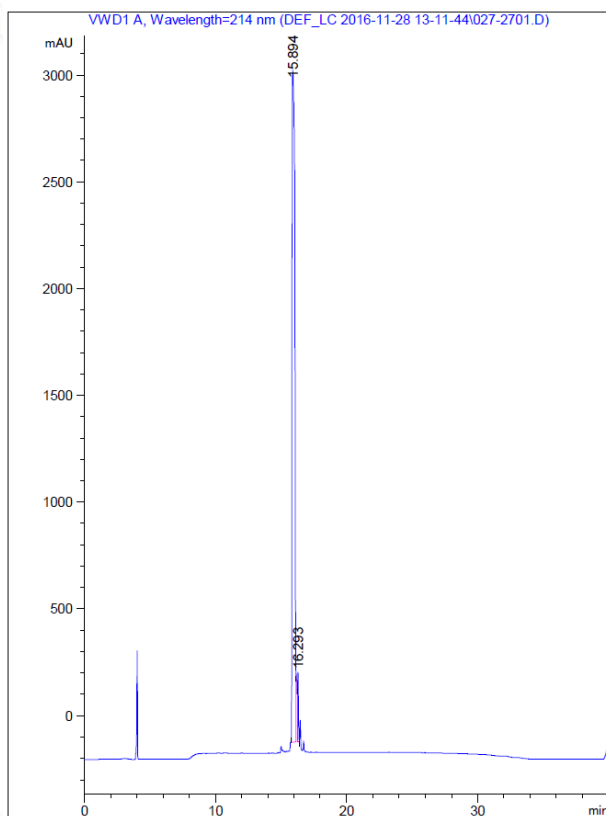

# EPI-X4 JM#23

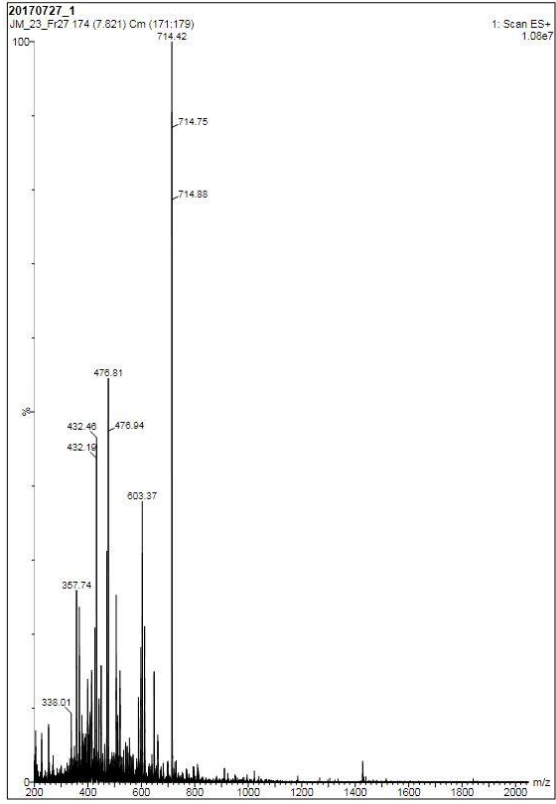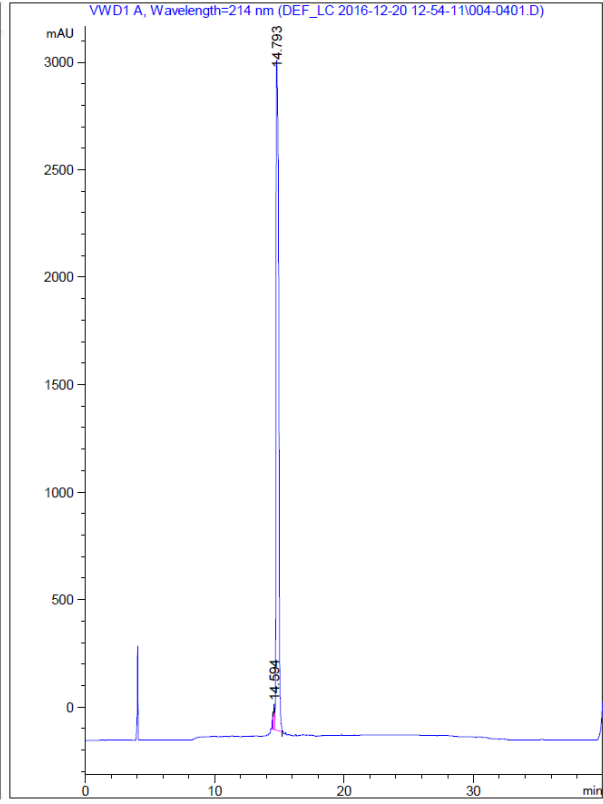

Supplement: mmc1.pdf [file mmc1.pdf]
